# Supplementary material for: A rotationally-driven dynamic solid phase sodium bisulfite conversion disc for forensic epigenetic sample preparation
Source: Royal Society of Chemistry journal article supplement (doi:10.1039/d3lc00867c), 2023-11-27

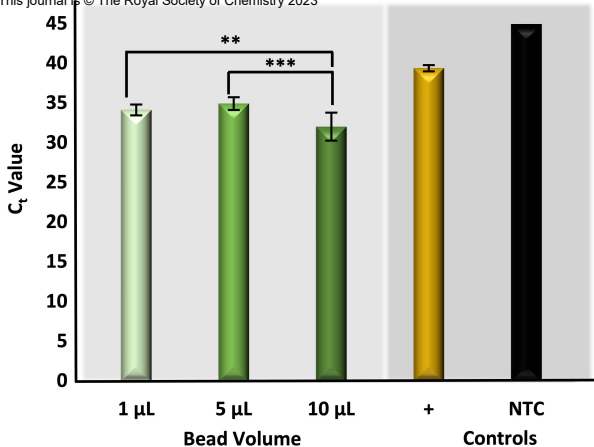

a

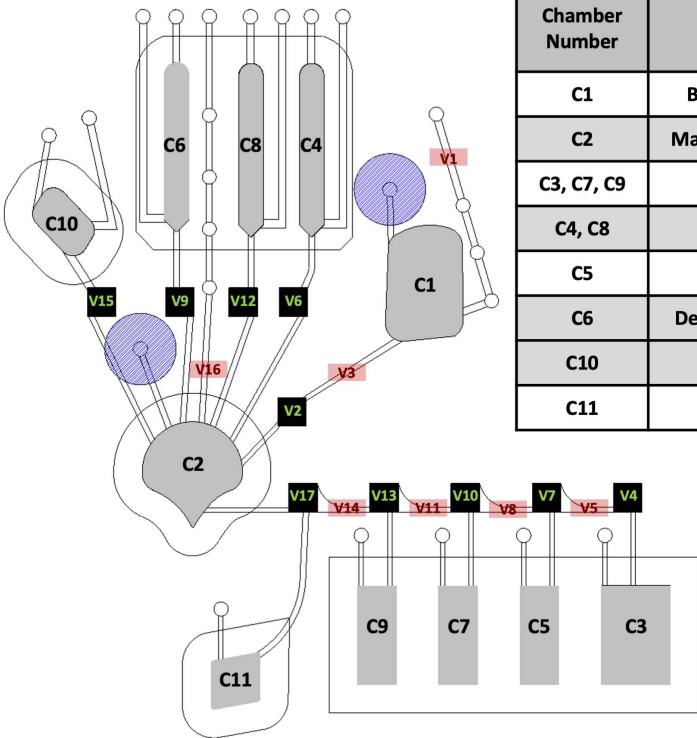

b

| Chamber Number | Chamber Name          |
|----------------|-----------------------|
| C1             | Bisulfite Conversion  |
| C2             | Magnetic Manipulation |
| C3, C7, C9     | Reagent Waste         |
| C4, C8         | Wash Buffer           |
| C5             | Reagent Waste         |
| C6             | Desulphonation Buffer |
| C10            | Elate Buffer          |
| C11            | BSC Eluate            |

c

| Valve Number | Radial Position (mm) |
|--------------|----------------------|
| Valve #1     | 19.0                 |
| Valve #2     | 33.7                 |
| Valve #3     | 33.3                 |
| Valve #4     | 46.9                 |
| Valve #5     | 46.8                 |
| Valve #6     | 28.9                 |
| Valve #7     | 44.8                 |
| Valve #8     | 44.9                 |
| Valve #9     | 30.9                 |
| Valve #10    | 43.4                 |
| Valve #11    | 43.7                 |
| Valve #12    | 29.4                 |
| Valve #13    | 42.5                 |
| Valve #14    | 43.3                 |
| Valve #15    | 33.2                 |
| Valve #16    | 33.7                 |
| Valve #17    | 42.4                 |

V Normally Closed Valve    
 V Channel Closure    
 C Reagent Chamber

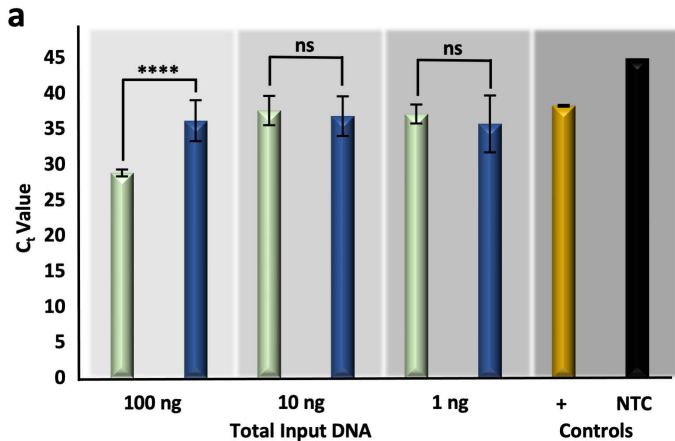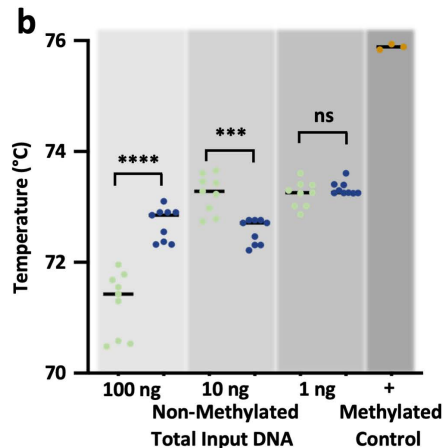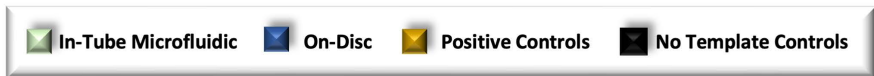

Supplement: d3lc00867c1.pdf [file d3lc00867c1.pdf]
