# Supplementary material for: A rotationally-driven dynamic solid phase sodium bisulfite conversion disc for forensic epigenetic sample preparation
Source: Royal Society of Chemistry journal article supplement (doi:10.1039/d3lc00867c), 2023-11-27
Supplement: d3lc00867c3.pdf [file d3lc00867c3.pdf]

| Procedural Step            | Gold-Standard<br>(min) | On-Disc<br>(min) |
|----------------------------|------------------------|------------------|
| Initial Denaturation       | 8                      | 1                |
| Sulphonation & Deamination | 60                     | 45               |
| Desulphonation             | 20                     | 20               |
| Ethanol Evaporation        | 20                     | 1                |
| DNA Elution                | 4                      | 4                |
| Total time (min)           | 112                    | 71               |
